# Supplementary material for: Reversibly storing over 12 wt% H2 by a trilayered lithium borohydride nanocomposite commencing from 70ºC
Source: Research Square preprint supplement (doi:10.21203/rs.3.rs-5744222/v1), 2025-05-14
Supplement: Supplementary file 1 [file 695505fced8dce280186db56.docx]

**Supplementary Materials for**

**Reversibly storing over 12 wt% H2 by a trilayered lithium borohydride nanocomposite commencing from 70 ºC**

**Wenxuan Zhang1,6, Xin Zhang1,6, Chaoqun Li2,6, Lingchao Zhang1, Huifeng Liu1, Zichen Lou1, Zhenguo Huang3, Guanglin Xia2, Mingxia Gao1, Wenping Sun1, Yongfeng Liu1,5**✉ **& Hongge Pan1,4**✉

1State Key Laboratory of Silicon and Advanced Semiconductor Materials and School of Materials Science and Engineering, Zhejiang University, Hangzhou 310027, China. 2Department of Materials Science, Fudan University, Shanghai 200433, China. 3School of Civil & Environmental Engineering, University of Technology Sydney, 81 Broadway, Ultimo, NSW, 2007, Australia. 4Institute of Science and Technology for New Energy, Xi’an Technological University, Xi’an 710021, China. 5Zhejiang Key Laboratory of Advanced Solid State Energy Storage Technology and Applications, Taizhou Institute of Zhejiang University, Taizhou 318000, China. 6These authors contributed equally: Wenxuan Zhang, Xin Zhang, Chaoqun Li. ✉email: [mselyf@zju.edu.cn](mailto:hgpan@zju.edu.cn); [hgpan@zju.edu.cn](mailto:mselyf@zju.edu.cn).

**Supplementary Table 1 |** H adsorption energy (*Eads*) at B sites in different coordination environments.

| Site | Coordination number | | | *Eads* (eV) |
| --- | --- | --- | --- | --- |
| Ni | C | B |
| B1 | 0 | 0 | 5 | -1.80 |
| B2 | 0 | 0 | 6 | 0.97 |
| C1 | 0 | 0 | 5 | -1.34 |
| C2 | 0 | 1 | 5 | -1.14 |
| N1 | 3 | 0 | 4 | -1.08 |
| N2 | 3 | 0 | 1 | -0.70 |
| N3 | 3 | 0 | 2 | -0.65 |
| N4 | 0 | 0 | 5 | -0.47 |


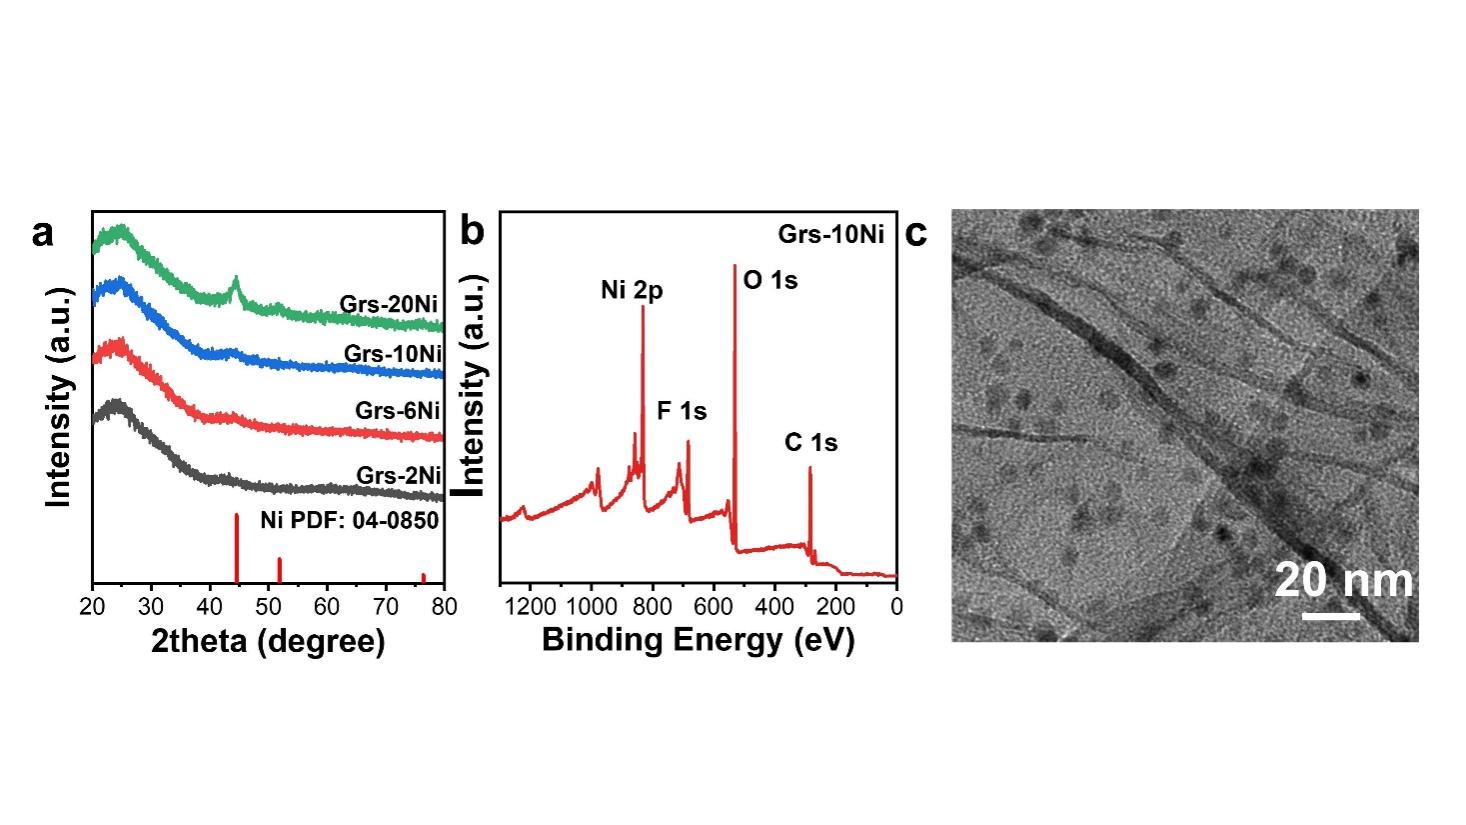


**Supplementary Figure 1 |** a) XRD patterns of Grs-*x*Ni, b) XPS survey spectrum and c) HRTEM image of Grs-10Ni.


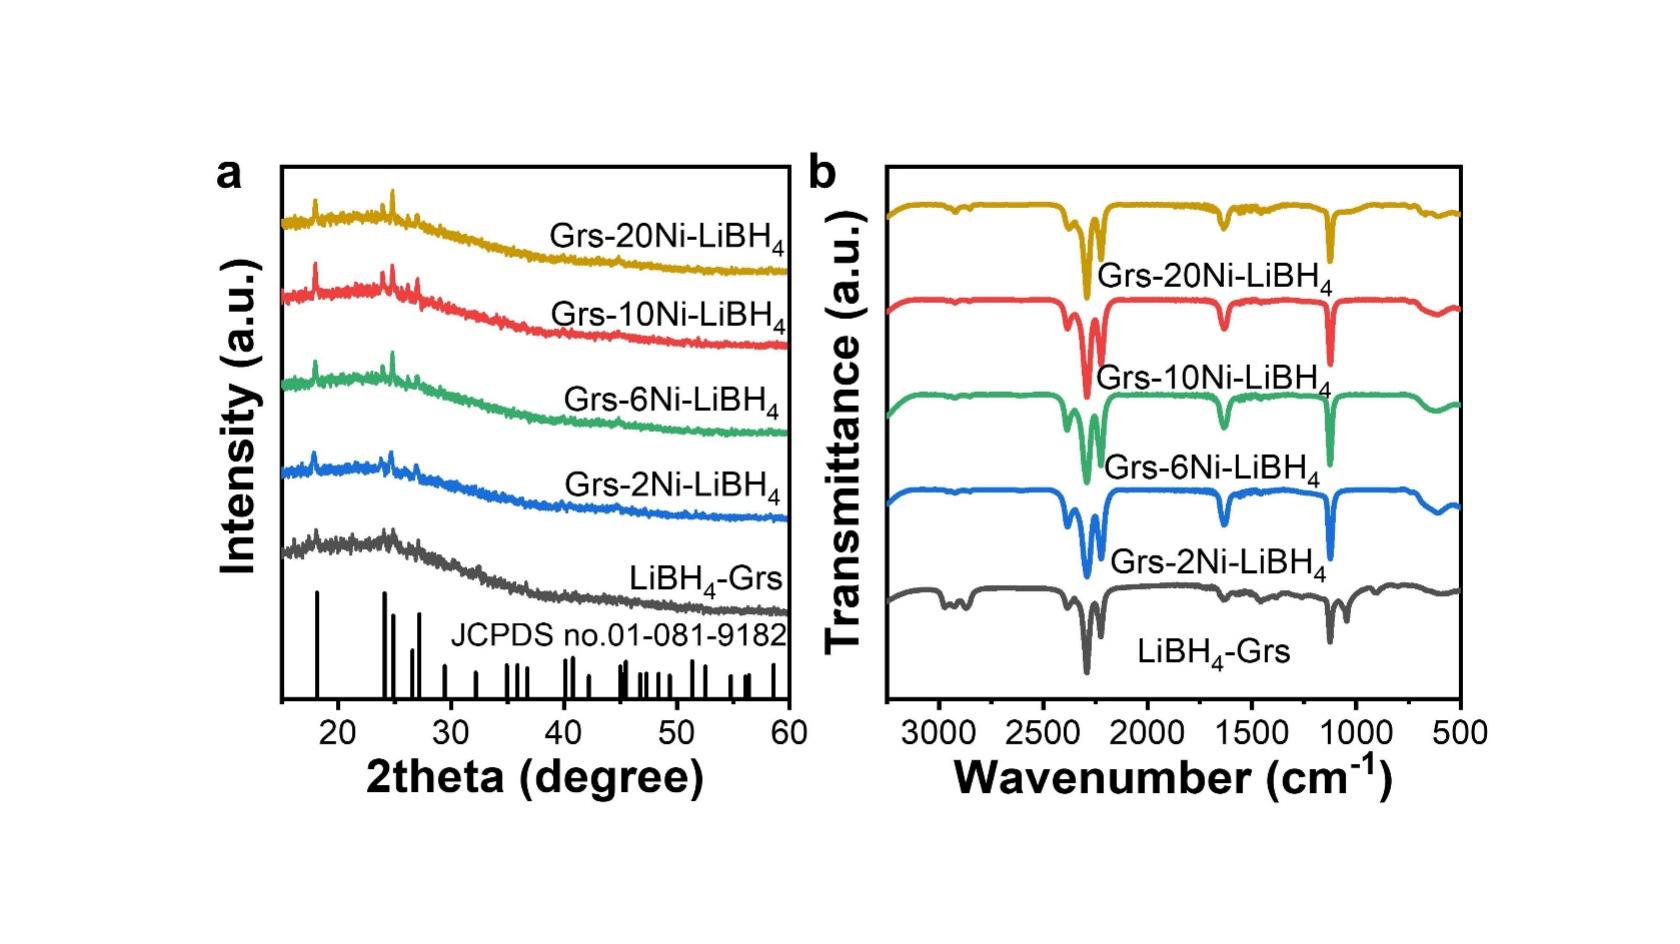


**Supplementary Figure 2 |** a) XRD patterns, b) FTIR spectra of Grs-*x*Ni-LiBH4 nanocomposite.


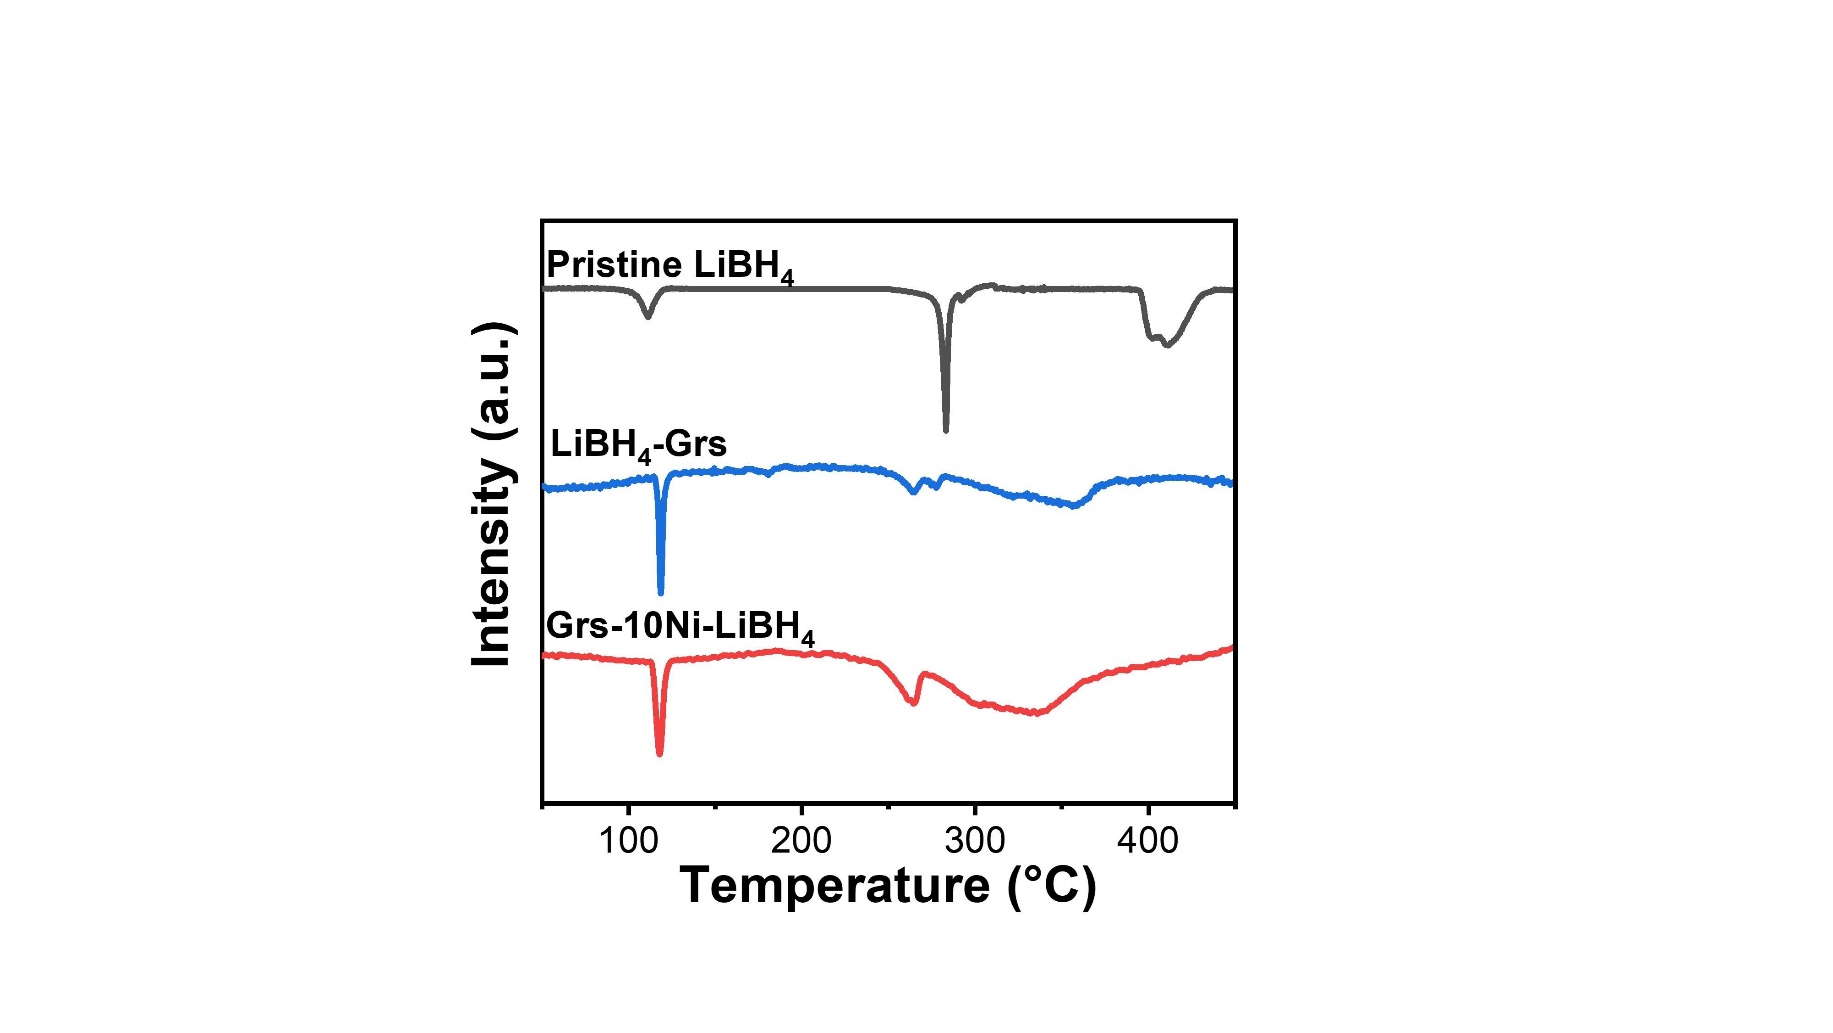


**Supplementary Figure 3 |** DSC curves of pristine LiBH4 and Grs-*x*Ni-LiBH4 nanocomposites.


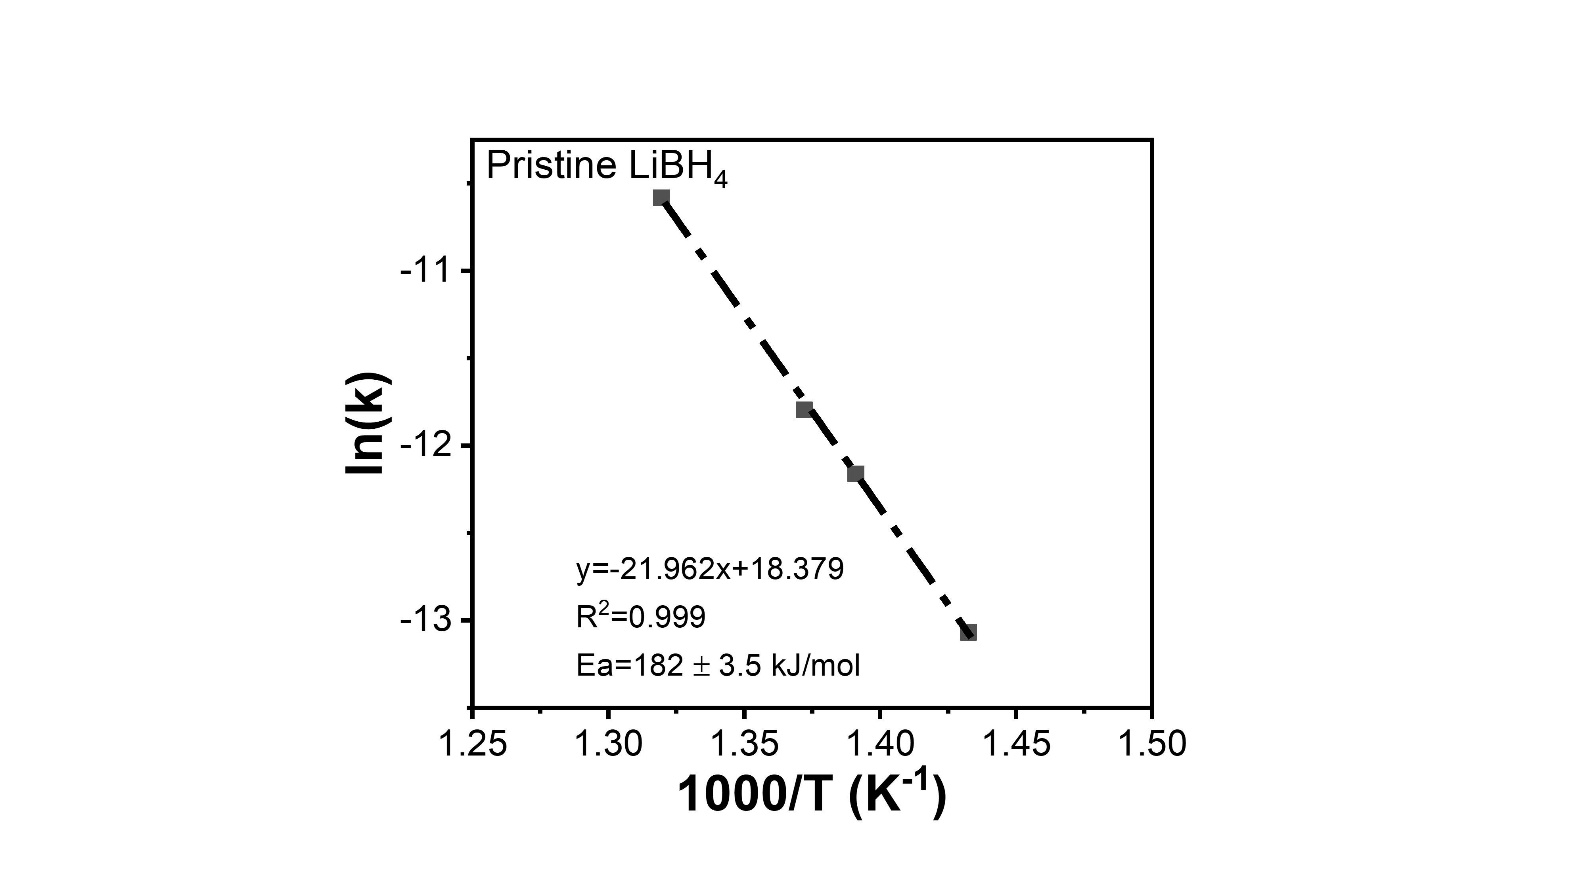


**Supplementary Figure 4 |** Kissinger’s plots of pristine LiBH4 under different heating rates.


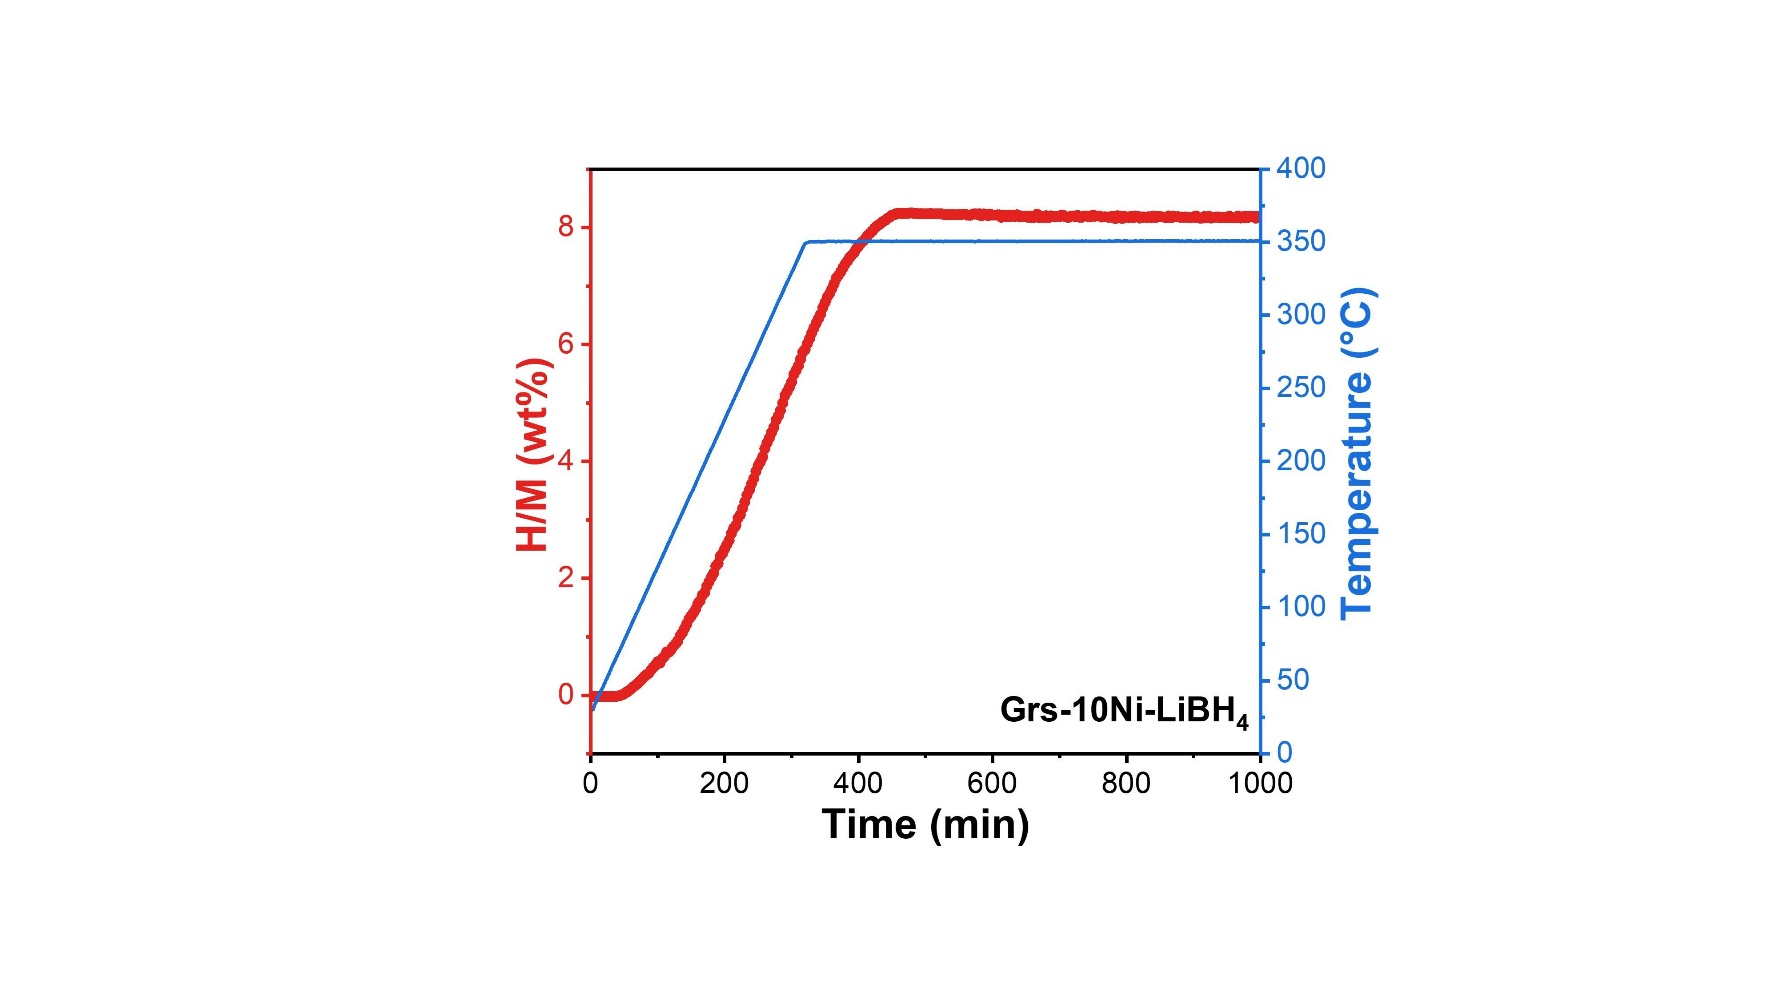


**Supplementary Figure 5 |** Non-isothermal hydrogenation curves of Grs-10Ni-LiBH4 nanocomposite.
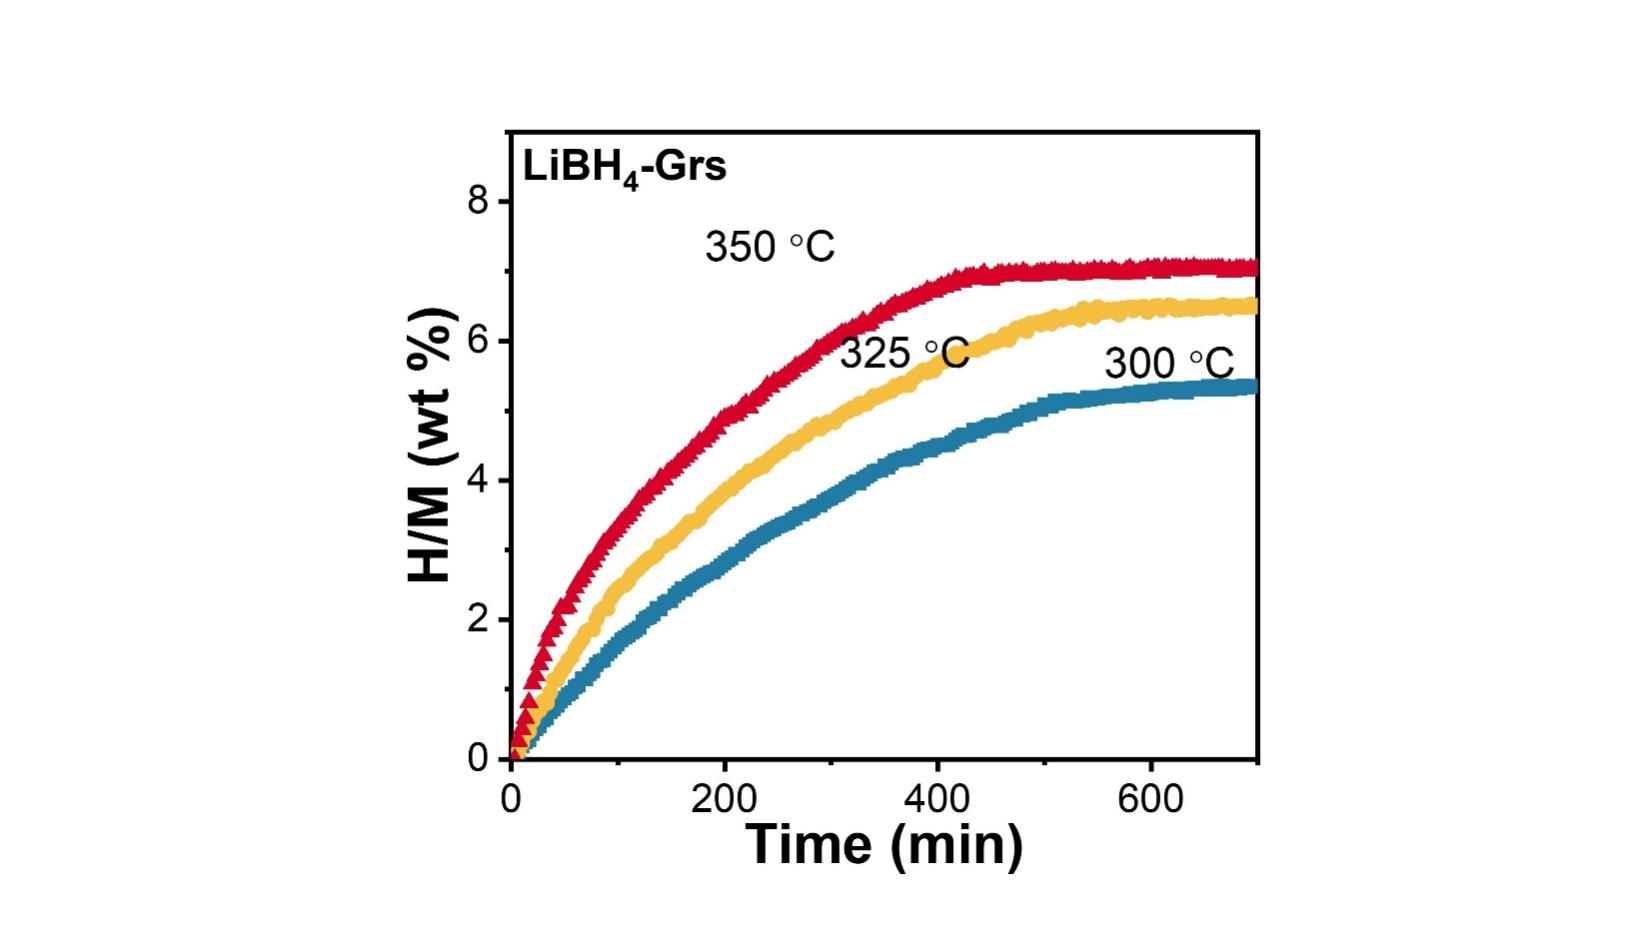


**Supplementary Figure 6 |** Isothermal hydrogenation curves of LiBH4-Grs nanocomposites.


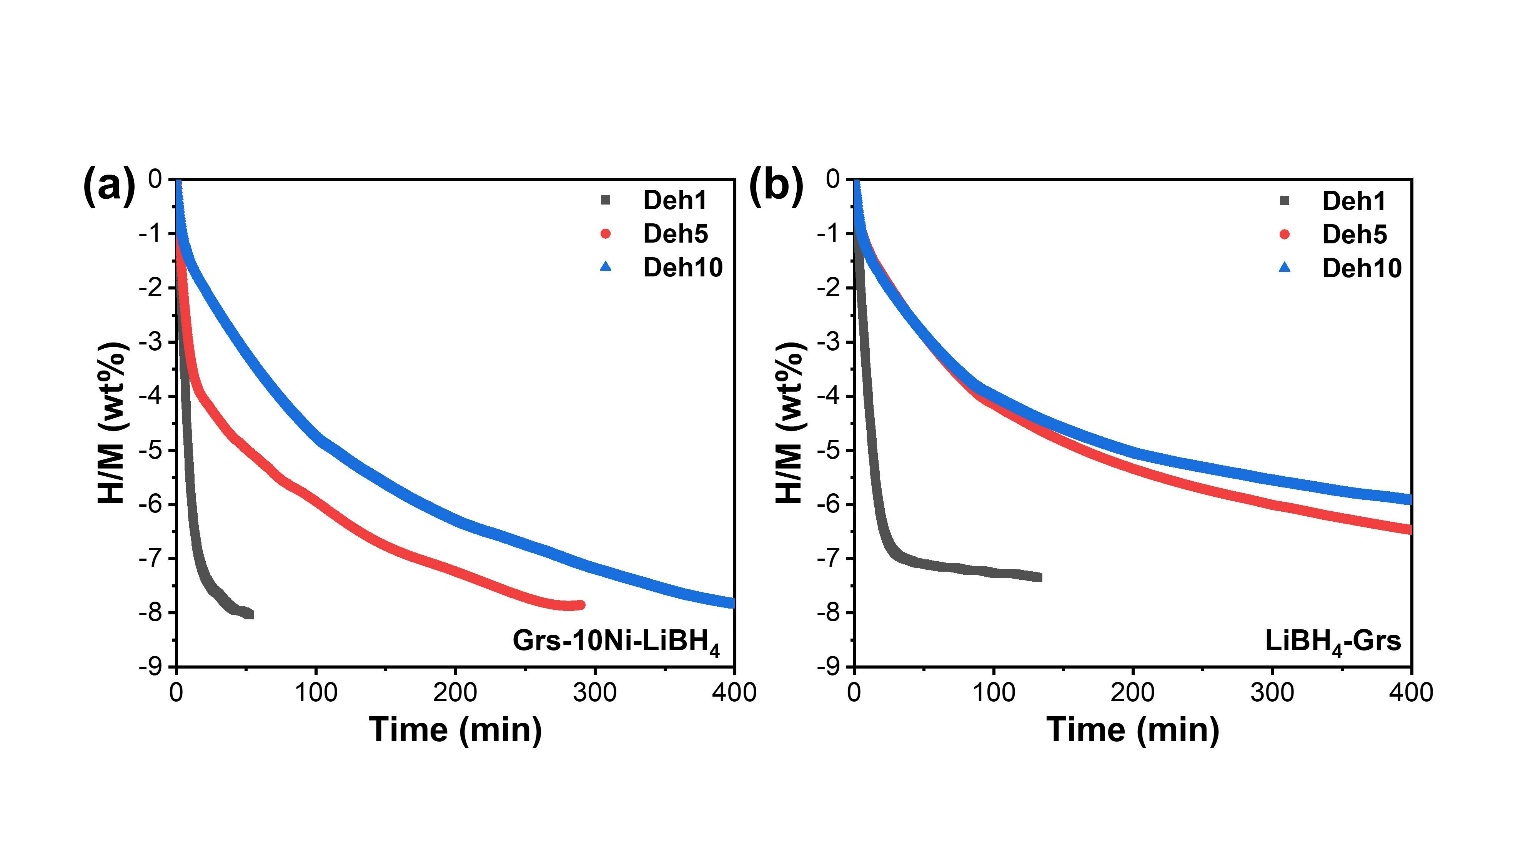


**Supplementary Figure 7 |** 1st, 5th and 10th isothermal dehydrogenation curves of a) Grs-10Ni-LiBH4 and b) LiBH4-Grs nanocomposites at 350 °C.


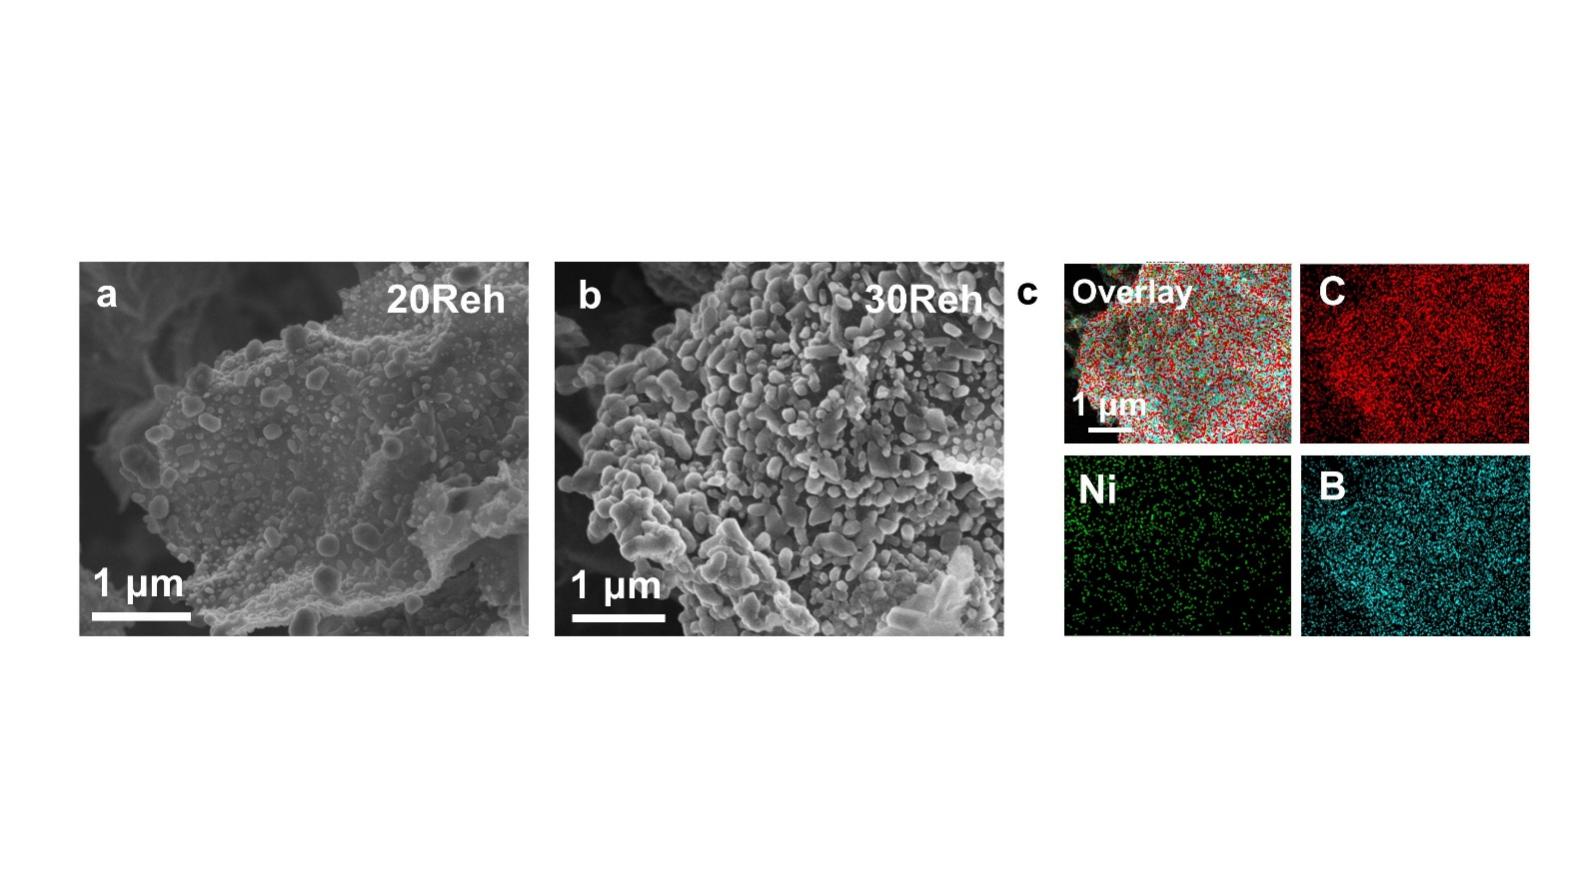


**Supplementary Figure 8 |** a) SEM image of Grs-10Ni-LiBH4 after 20th rehydrogenation, b-c) SEM image and corresponding EDS mappings of Grs-10Ni-LiBH4 after 30th rehydrogenation.


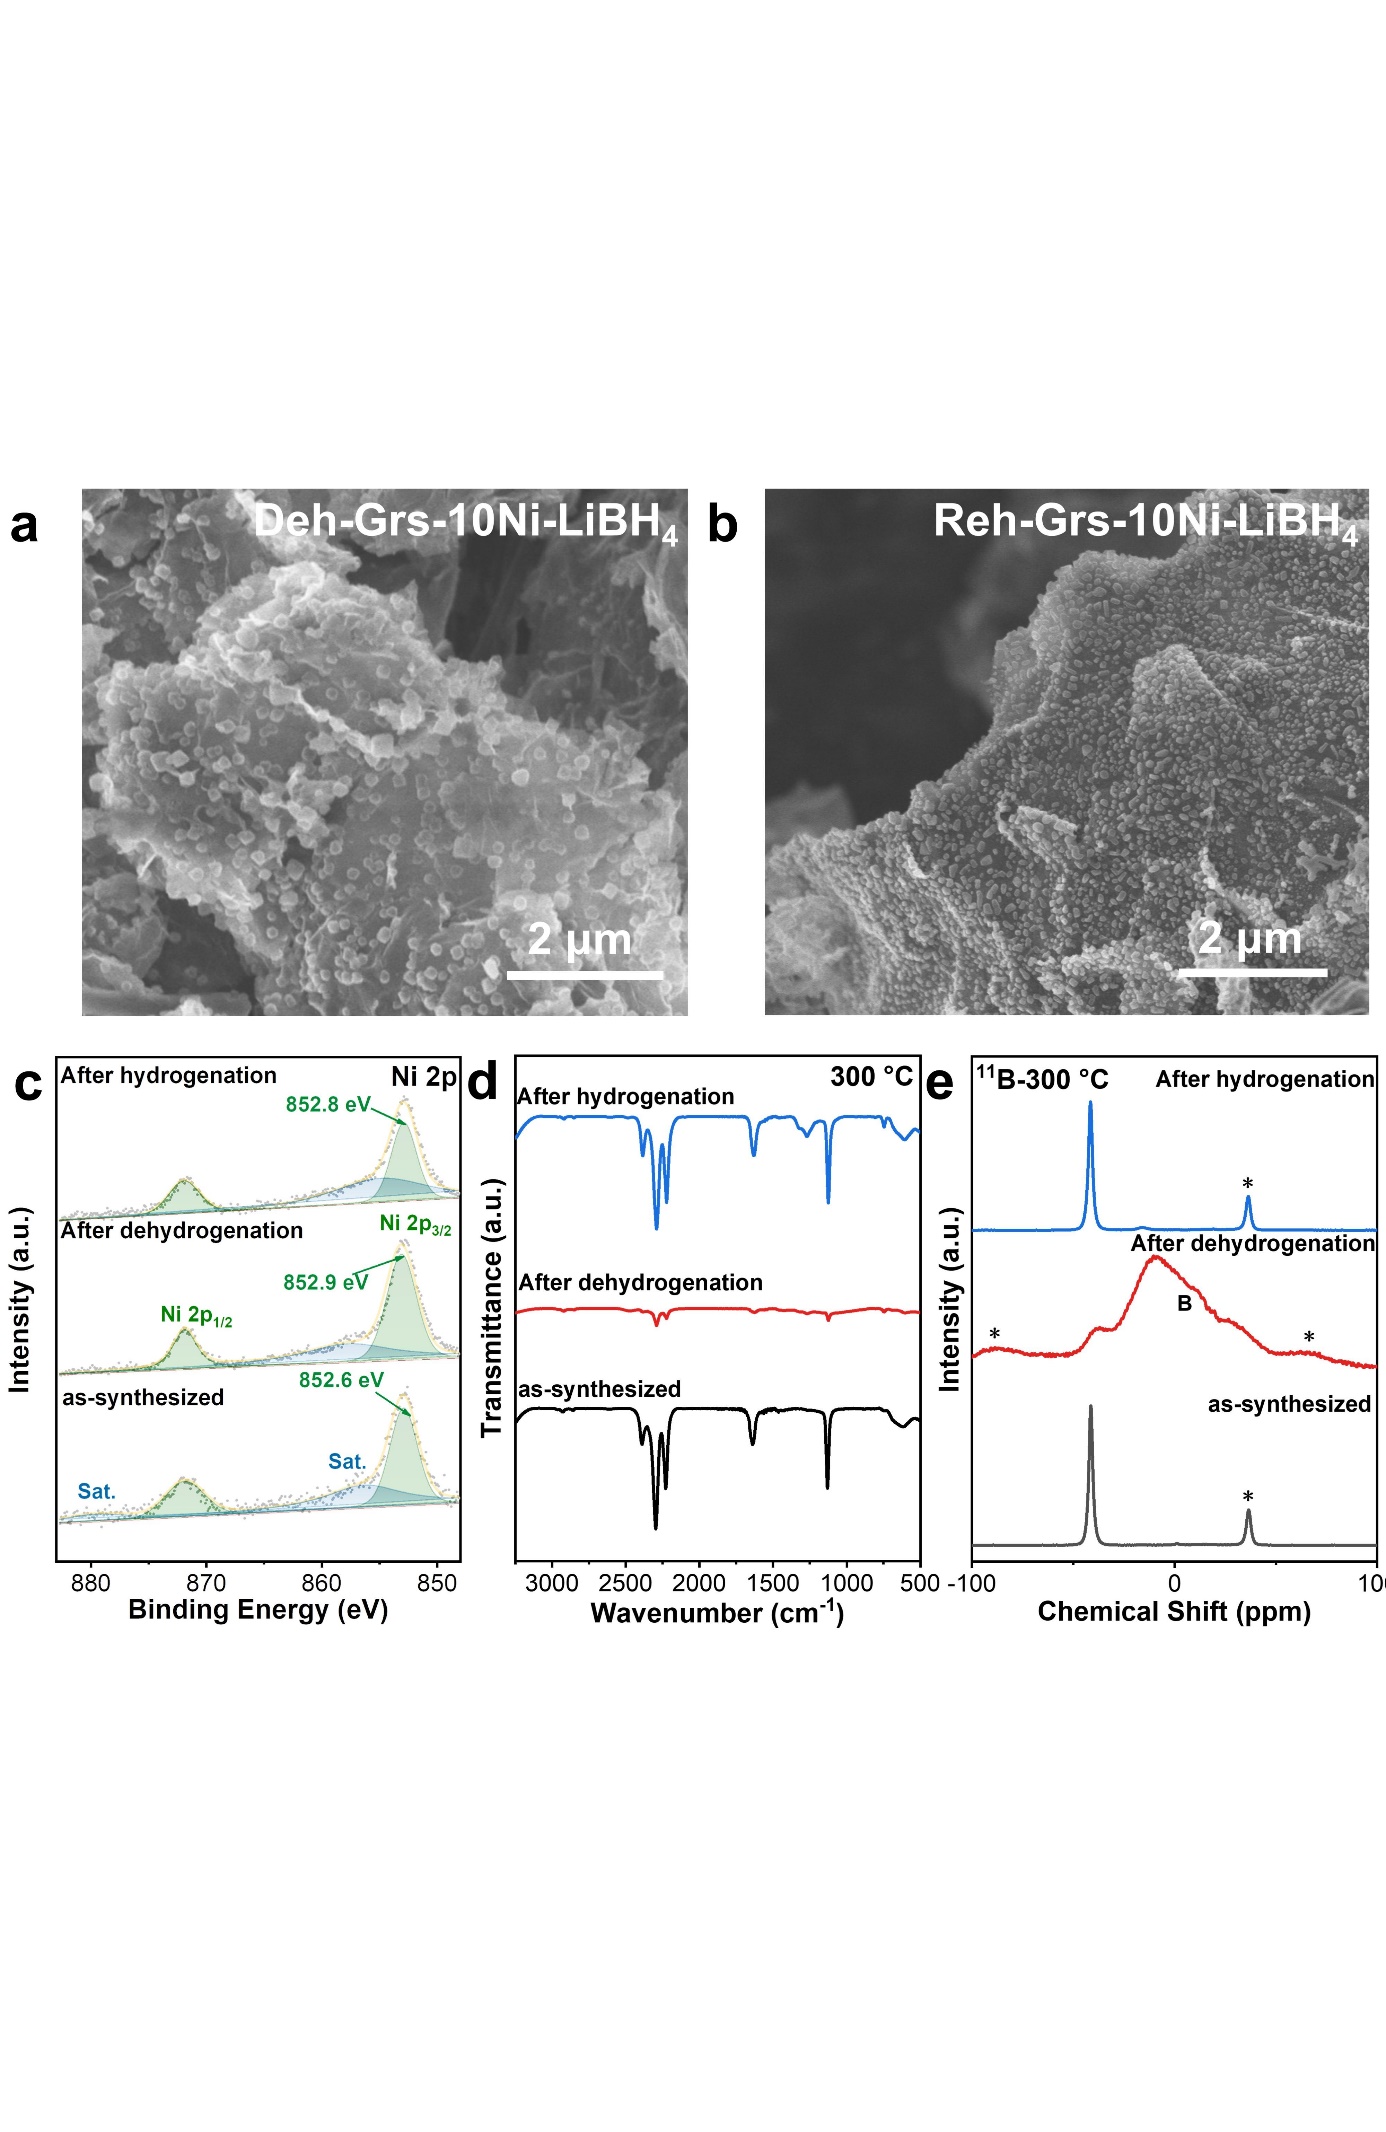


**Supplementary Figure 9 |** SEM images of Grs-10Ni-LiBH4 nanocomposite after a) dehydrogenation and b) hydrogenation, c) high-resolution Ni 2p XPS spectra, d) FTIR spectra and e) solid state 11B NMR spectra of LiBH4-Grs-10Ni nanocomposite after dehydrogenation and hydrogenation at 300 ºC. The peaks marked with * in e) indicate the spinning sidebands.


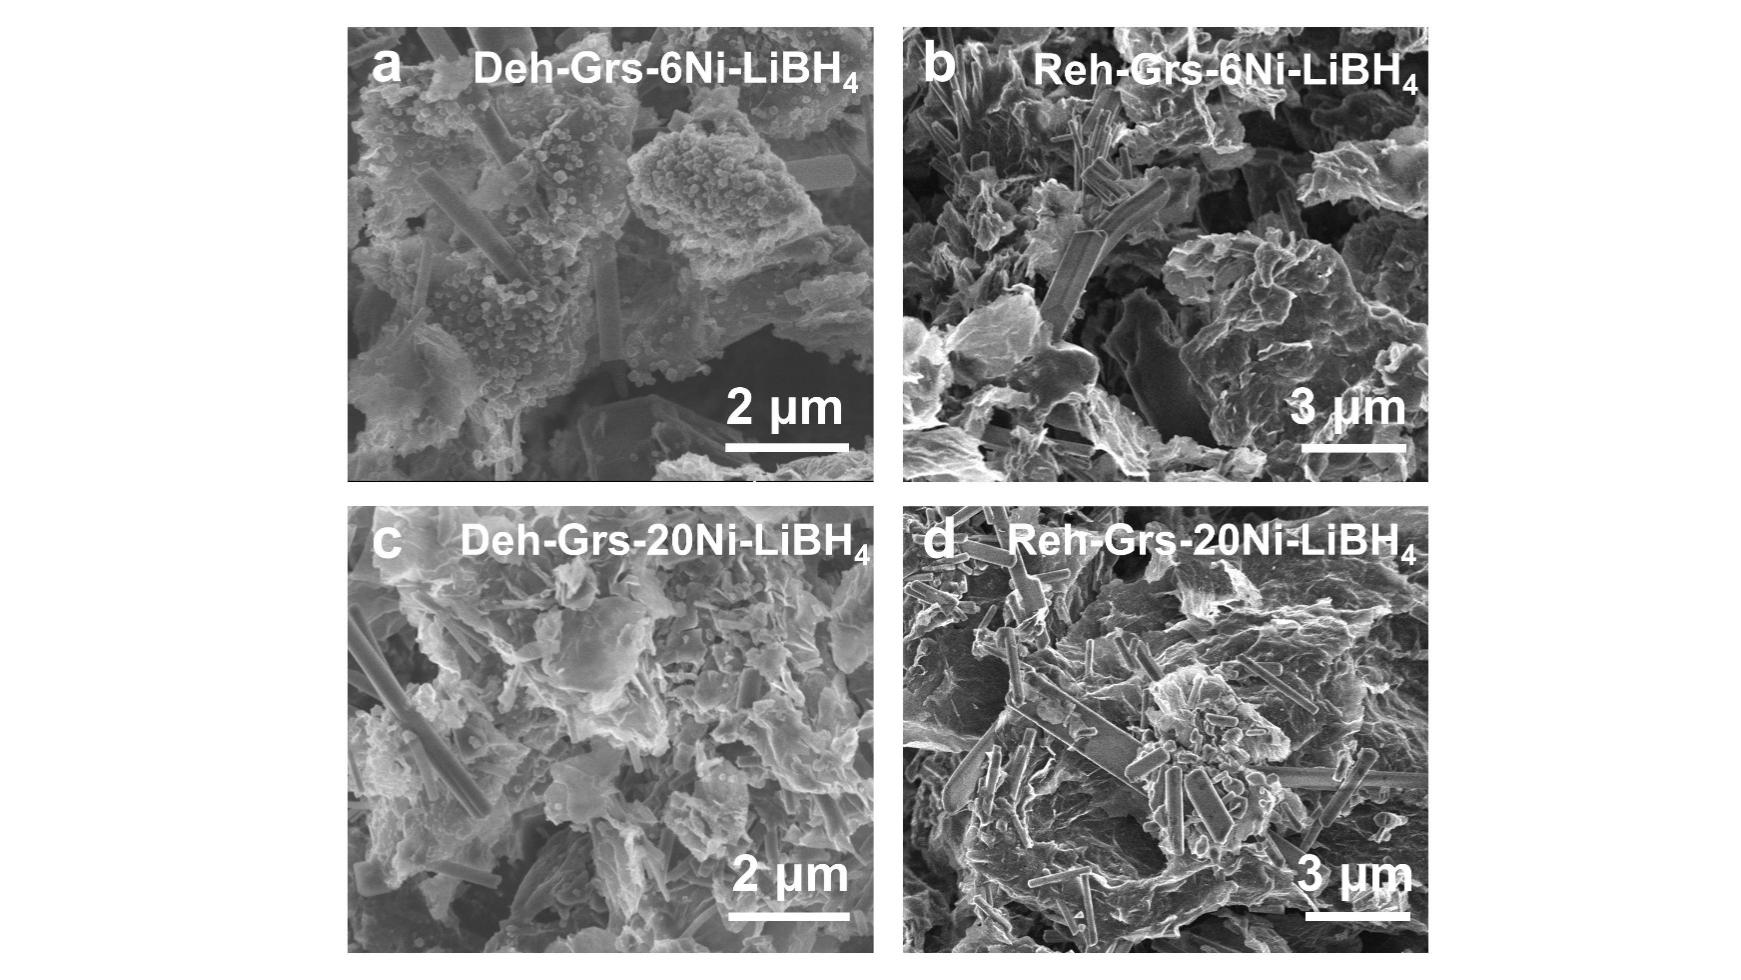


**Supplementary Figure 10 |** SEM images of Grs-6Ni-LiBH4 after a) dehydrogenation and b) hydrogenation, SEM images of Grs-20Ni-LiBH4 after c) dehydrogenation and d) hydrogenation.


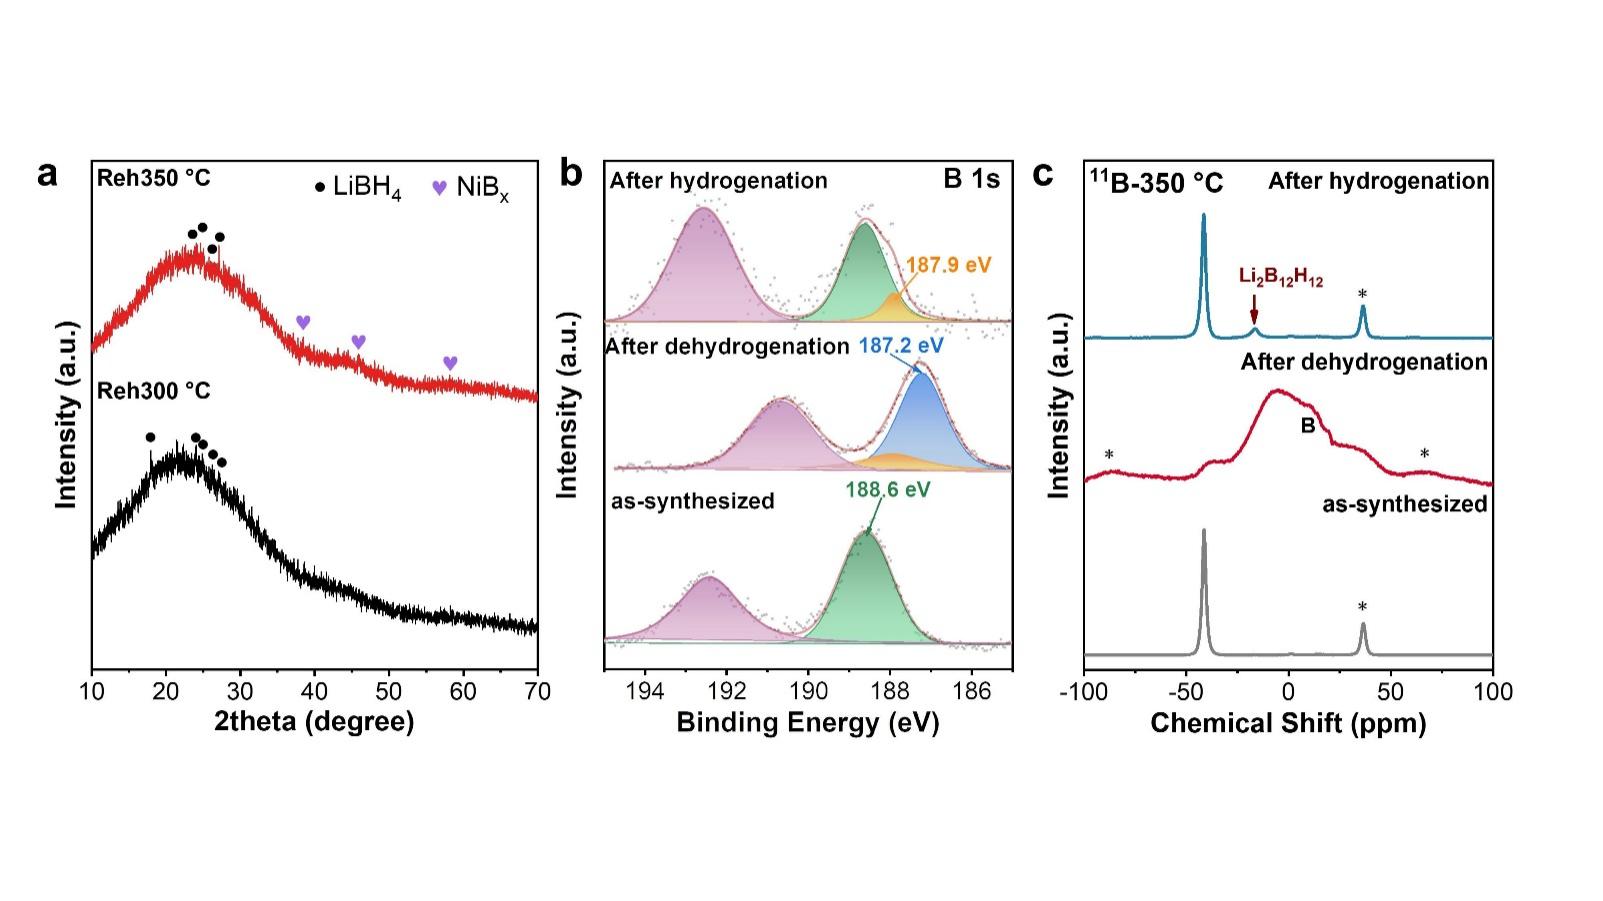


**Supplementary Figure 11 |** a) XRD patterns, b) high-resolution B 1s XPS spectra and c) solid state 11B NMR spectra of LiBH4-Grs-10Ni nanocomposite after dehydrogenation and hydrogenation at 350 ºC.. The peaks marked with * in c) indicate the spinning sidebands.


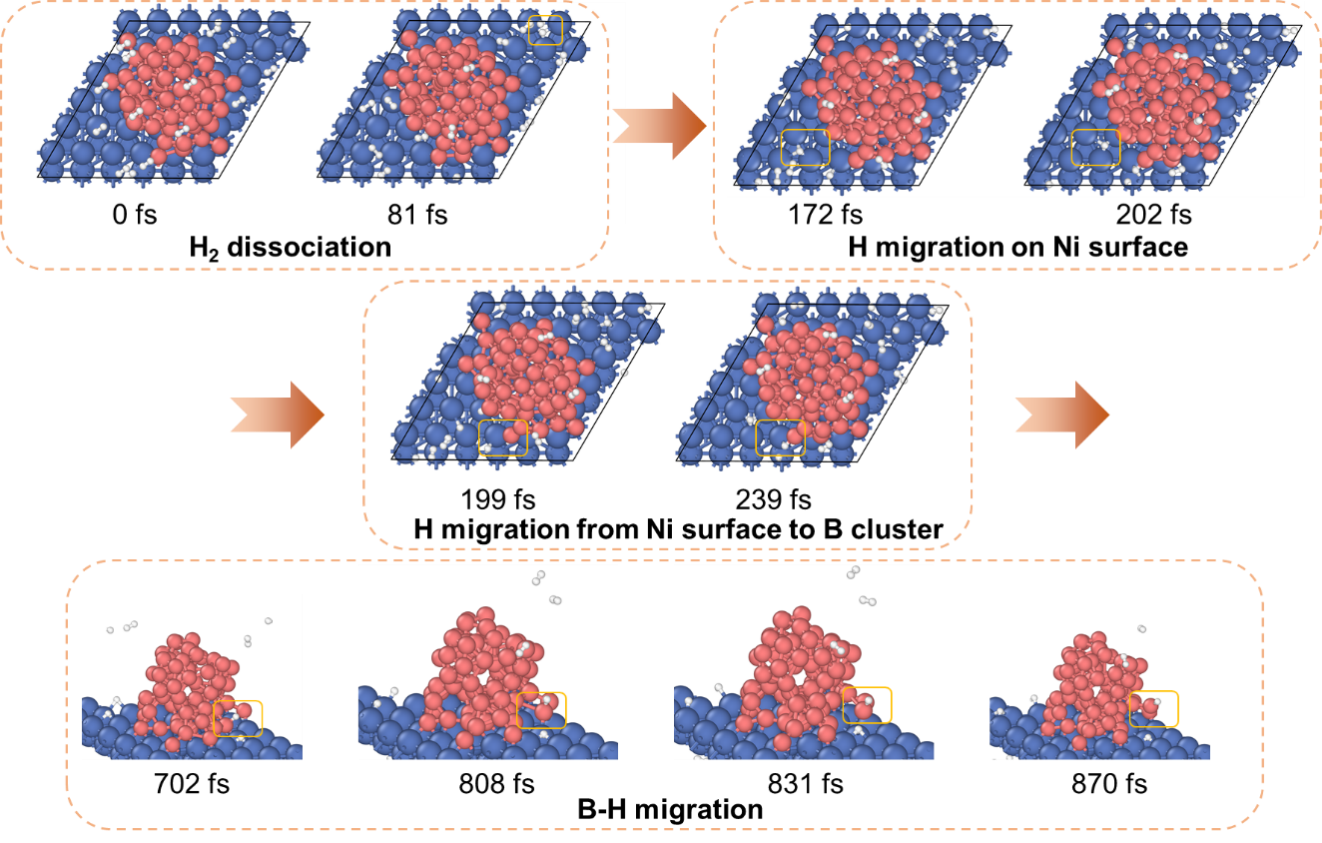


**Supplementary Figure 12 |** Ab initio molecular dynamics (AIMD) simulation of H2 reaction around Ni-B. The dissociation, adsorption, and migration of hydrogen on the Ni-B surface at 500 K were simulated, revealing the breaking and recombination of B-B bonds during the migration of the B-H groups.
